# Supplementary material for: A Multimethod Study of Mental Health Care Patients’ Attitudes Toward Clinician-Level Performance Information
Source: Atypon-hosted journal article supplement (doi:10.1176/appi.ps.202000366), 2021-02-03
Supplement: appi.ps.202000366.ds001.pdf [file appi.ps.202000366.ds001.pdf]

### **Stakeholder Advisory Board**

The project advisory board was comprised of two psychotherapy researchers, two decision-making scientists, and three mental health care patients with lived experience. The board included one Black woman, and six White men, with ages ranging from 24 to 60 years. This board also assisted in the development of the qualitative interview protocol. The survey was also pilot-tested and refined based on MHC consumer feedback and quantitative readability metrics. Twelve consumers volunteered to assist with this. This group included three Black women, four white women, four white men, and one Hispanic man; age range 20 to 32 years.

## Survey

If completing this survey on another's behalf, please answer the following questions in relation to that person. For example, state that person's age rather than your own.

1. Age in years: \_\_\_\_\_
  
2. Gender:
  - \_\_\_\_\_ female
  - \_\_\_\_\_ male
  - \_\_\_\_\_ transgender
  - \_\_\_\_\_ Other gender
  
3. Race/ethnicity:
  - \_\_\_\_\_ Hispanic/Latino(a)
  - \_\_\_\_\_ East Asian
  - \_\_\_\_\_ South Asian
  - \_\_\_\_\_ African American/Black
  - \_\_\_\_\_ Native American
  - \_\_\_\_\_ European American/White
  - \_\_\_\_\_ Hawaiian/Pacific Islander
  - \_\_\_\_\_ Biracial/multiracial
  - \_\_\_\_\_ Other race/ethnicity
  
4. Marital status:
  - \_\_\_\_\_ separated or divorced
  - \_\_\_\_\_ married/in a domestic partnership
  - \_\_\_\_\_ single
  - \_\_\_\_\_ widowed
  
5. Household annual income:
  - \_\_\_\_\_ Less than \$25,000
  - \_\_\_\_\_ \$25,001 - \$50,000
  - \_\_\_\_\_ \$50,001 - \$75,000
  - \_\_\_\_\_ \$75,001 - \$100,000
  - \_\_\_\_\_ \$101,001+

6. Religion – if no affiliation, please write "none":

\_\_\_\_\_

7. Highest education level:

\_\_\_\_\_ Did not complete high school or GED

\_\_\_\_\_ Completed high school or GED

\_\_\_\_\_ Some college

\_\_\_\_\_ Completed an Associate's degree

\_\_\_\_\_ Completed a four year college degree

\_\_\_\_\_ Some graduate or medical school

\_\_\_\_\_ Completed a master's degree

\_\_\_\_\_ Completed a doctoral or MD degree

**Treatment History:**

Reminder: If completing on another's behalf, please answer the following questions in relation to that person.

8. Mental health service(s) currently receiving or seeking. Please check all that apply:

\_\_\_\_\_ Individual psychotherapy

\_\_\_\_\_ Group psychotherapy

\_\_\_\_\_ Medication

\_\_\_\_\_ Marital therapy

\_\_\_\_\_ Family therapy

\_\_\_\_\_ Case management

\_\_\_\_\_ In home therapy

\_\_\_\_\_ Family support

\_\_\_\_\_ School based services

\_\_\_\_\_ Community support

\_\_\_\_\_ Other, please

describe: \_\_\_\_\_

9. Who referred you or played a key role in your referral to your current treatment setting? Check all that apply:

\_\_\_\_\_ Primary/family care doctor

\_\_\_\_\_ Other mental health care provider

- Insurance company
- Friend or family member
- Self
- Other, please describe: \_\_\_\_\_

10. Which of the following problems best capture your reason for seeking services at this time?

Check all that apply:

- Depression
- Anxiety
- Trauma
- Eating disorder
- Marital or family problems
- Behavioral problems
- Development disability
- Learning disability
- Attentional problems
- Brain injury
- Psychotic symptoms
- Bipolar disorder
- Substance use
- Other, please describe: \_\_\_\_\_

11. Do you receive Medicare or Medicaid (for Massachusetts residents, includes MassHealth)?

- Yes
- No

12. Have you received mental health services in the past?

- Yes
- No

13. How many different mental health therapists or counselors have you seen in your lifetime? \_\_\_\_\_

14. How many different providers have prescribed you medication for your mental health in your lifetime? \_\_\_\_\_

15. Were there any times in your life when you wanted a mental health provider and could not find one?

\_\_\_\_\_ Yes

\_\_\_\_\_ No

16. Has it been hard to find a mental health provider who you were confident could help you?

\_\_\_\_\_ Yes

\_\_\_\_\_ No

17. Has a health care provider or agency ever recommended a specific mental health care provider to you?

\_\_\_\_\_ Yes

\_\_\_\_\_ No (if No, please skip to question 18)

17a. If you responded “Yes” to question 17, did the person or agency that gave you the recommendation explain what the recommendation was based on?

\_\_\_\_\_ Yes

\_\_\_\_\_ No

18. Has any professional ever discussed with you the pros and cons of choosing one mental health provider vs. another?

\_\_\_\_\_ Yes

\_\_\_\_\_ No

19. Have you ever used a consumer satisfaction rating website, such as Angie’s List or Healthgrades, to find a mental health care provider?

\_\_\_\_\_ Yes

\_\_\_\_\_ No (if No, please skip to question 20)

19a. If you responded “Yes” to question 19, did you find the website helpful in finding a provider?

\_\_\_\_\_ Yes

\_\_\_\_\_ No

20. Do you believe that all mental health care providers are capable of helping you?

\_\_\_\_\_ Yes

\_\_\_\_\_ No

21. Imagine that you could see a list of mental health providers’ track records in helping people with issues like your own (that is, a list of the percentage of people who they have helped versus the percentage of people who they have not helped). Would you trust these data and how they were collected?

\_\_\_\_\_ Yes

\_\_\_\_\_ No

22. Imagine that you could see a list of mental health providers' track records in helping people with issues like your own. Would you use this list to help you select your provider?

\_\_\_\_\_ Yes

\_\_\_\_\_ No

23. Imagine that a health care professional like your primary care doctor is giving you a referral for a mental health provider. Would you feel more confident about your options if you knew that this person had reviewed providers' track records in helping people like you?

\_\_\_\_\_ Yes

\_\_\_\_\_ No

24. Imagine that your insurance company is giving you a referral for a mental health provider. Would you feel more confident about your options if you knew that your company had reviewed providers' track records in helping people like you?

\_\_\_\_\_ Yes

\_\_\_\_\_ No

25. Would you pay more out of pocket to see a mental health care provider who is listed as highly effective in treating the problems that you have?

\_\_\_\_\_ Yes

\_\_\_\_\_ No

26. Should mental health care consumers have access to information on the track records of providers in the local area?

\_\_\_\_\_ Yes

\_\_\_\_\_ No

27. Would it be important for you to be assigned or referred to a mental health care provider based on their track record in helping people with issues like your own?

\_\_\_\_\_ Yes

\_\_\_\_\_ No

28. Would it be more important than usual for you to be assigned or referred to a mental health care provider based on their track record in helping people with issues like your own **IF** you previously have not benefited from mental health treatment for that problem?

\_\_\_\_\_ Yes

\_\_\_\_\_ No

29. Do you think access to information on the track records of mental health care providers would increase the likelihood of someone being helped by treatment?

\_\_\_\_\_ Yes

\_\_\_\_\_ No

30. Do you think that matching a consumer with a provider who has a track record of helping people with similar issues would increase the likelihood of that consumer being helped by treatment?

\_\_\_\_\_ Yes

\_\_\_\_\_ No

**For the last three questions, please circle the response that best fits you (scale of 1- 6).**

|                                                                               | <u>Not at all good</u> |   |   | <u>Extremely good</u> |   |   |
|-------------------------------------------------------------------------------|------------------------|---|---|-----------------------|---|---|
| How good are you at working with fractions?                                   | 1                      | 2 | 3 | 4                     | 5 | 6 |
| How good are you at figuring out how much a shirt will cost if it is 25% off? | 1                      | 2 | 3 | 4                     | 5 | 6 |
|                                                                               | <u>Never</u>           |   |   | <u>Very often</u>     |   |   |
| How often do you find numerical information to be useful?                     | 1                      | 2 | 3 | 4                     | 5 | 6 |

## **Interview Method**

Upon transcription and further review, five of the 37 interviews/recordings were deemed inappropriate for subsequent analysis, either due to problems with the recording or being of highly atypical in length (thus, judged to be non-adherent). As noted, based on existing standards for consensual qualitative research (CQR), we randomly selected 15 interview cases for analysis.

The interviewers were one female and one male advanced doctoral student who were extensively trained in the interview protocol. Both identified as White. Subsequent to extensive training, judges independently coded transcripts. This was followed by discussions to achieve consensus, with the consensus codes then being reviewed by an external data auditor. Judges integrated auditor feedback and continued to pursue final consensus through an iterative process. The judges consisted of two female and two male advanced doctoral students. All identified as White. The auditor was male, White, with significant CQR experience. The judges and auditors had positive views of MBC. However, the analysis team did not have strong expectations regarding how participants would respond to the specific interview questions. Compared with other qualitative methods, the goal of CQR is not to achieve theoretical saturation, in part, because such thresholds are not clearly defined. CQR is specifically designed to foster an in-depth examination of individuals' experiences, and the recommended sample size is 8-15 (7).

Codes were broken down into three main components: domains (overarching themes prevalent within the data); core ideas (the basic foundation of participants' own words; each core idea reflects a complete thought within each domain); and categories/subcategories (grouping established to determine degree of prevalence across transcripts). Consistent with the CQR approach, representativeness of categories/subcategories were classified as: general (emerged for 13 or 14 participants); typical (emerged for 8-12 participants); variant (emerged for 2-7 participants); and rare (emerged for 1 participant).



### Consumer Interview Items

1. What mental health services are you (or the identified client) currently receiving? Have received in the past?
2. What types of mental health care providers have you (or the identified client) worked with?
3. Can you describe, in as vivid detail as possible, what your experience has been when trying to identify a mental health care provider with whom to work (or with whom the identified can work)?
  - How have you found providers in the past?
  - Has it been easy or difficult to find someone?
  - Did you know anything about your provider(s) before the first appointment?
  - Did you feel as though you had a say in selection?
4. What do you think would have been helpful/what would you have wanted to help you make a more informed choice regarding your treatment provider?
5. In the context of receiving services, have you ever been asked to complete a questionnaire asking you about your (or the identified client's) difficulties (e.g., symptoms, functioning, quality of life) and/or satisfaction with your provider or services?
  - a. If so, how do you think that information is used?
  - b. How should it be used?
6. Do you, or would you, want access to provider performance information (i.e., provider success rates in treating their previous clients)? Why or why not?
  - a. If you do want access, how would you prefer to receive it? E.g., Online? Through another provider who is referring you? As a handout?
7. What factors are important to you when selecting a treatment provider (or when considering a provider for the identified client)?
  - a. Are these factors more, less, or equally important? Can you rank them in terms of importance?
8. Given its capability of identifying "higher" and "lower" performing providers based on their track record, the field also could potentially match clients to providers who seem particularly well suited for them. Would you be willing to wait to see a "preferred" or matched provider if he or she was currently unavailable?
  - a. Would you pay more?

- b. Are there other things in your previously stated list of important factors in making provider decisions that you would rank lower than seeing a “preferred” or matched provider were it possible to do so?
9. If you were given a list of “well-matched” providers, would you feel comfortable making a provider selection based on that list?
- a. Alternatively, would you feel more comfortable if other professionals use such a list to make a specific recommendation or recommendations? That is, would you want your primary care doctor or outpatient care setting to make a specific referral recommendation based on this information rather than have direct access to it yourself?
  - b. Would you prefer a list of “preferred” providers in your area, or the identification of a specific provider?
10. What are the potential costs or pitfalls to using provider track record information for provider selection?
11. Should higher performing providers be reimbursed at a higher rate?
12. Please discuss, in as much detail as you can, the steps that you think should be taken to improve the mental health care provider selection process. What would be most helpful to you? We are very interested in your voice on this important matter.

Table

**Demographic characteristics and endorsed presenting problem domains (N = 403)**

| Demographic              |             |      | Presenting Problem  | n   | %    |
|--------------------------|-------------|------|---------------------|-----|------|
| Age <i>M</i> ± <i>SD</i> | 41.30±12.58 |      | Depression          | 295 | 73.4 |
|                          | n           | %    | Anxiety             | 315 | 78.4 |
| Gender                   |             |      | Trauma              | 172 | 42.8 |
| Female                   | 268         | 66.5 | Eating              | 42  | 10.4 |
| Male                     | 130         | 32.3 | Marital/Family      | 72  | 17.9 |
| Transgender              | 5           | 1.2  | Behavioral Problems | 89  | 22.1 |
|                          |             |      | Developmental       | 24  | 6.0  |
| Ethnicity                |             |      | Learning            | 69  | 17.2 |
| Hispanic                 | 60          | 14.9 | Attention           | 108 | 26.9 |
| Asian                    | 10          | 2.7  | Brain Injury        | 17  | 4.2  |
| African-American         | 57          | 14.1 | Psychotic           | 38  | 9.5  |
| Native American          | 6           | 1.5  | Bipolar             | 131 | 32.6 |
| White                    | 206         | 51.1 | Substance Use       | 89  | 22.1 |
| Multiracial              | 24          | 6.0  | Other               | 27  | 6.7  |
| “Other”                  | 40          | 9.9  |                     |     |      |
| Marital Status           |             |      |                     |     |      |
| Separated/Divorced       | 77          | 21.4 |                     |     |      |
| Married/Domestic         | 66          | 18.4 |                     |     |      |
| Partnership              |             |      |                     |     |      |
| Single                   | 203         | 56.5 |                     |     |      |
| Widow                    | 13          | 3.6  |                     |     |      |
| Education                |             |      |                     |     |      |
| Did Not Complete         | 50          | 13.9 |                     |     |      |
| HS/GED                   |             |      |                     |     |      |
| Completed High           | 98          | 27.3 |                     |     |      |
| School/GED               |             |      |                     |     |      |
| Some College             | 114         | 31.8 |                     |     |      |
| Associates Degree        | 46          | 12.8 |                     |     |      |
| Four-Year Degree         | 26          | 7.2  |                     |     |      |
| Professional Degree      | 25          | 6.9  |                     |     |      |
| Household Income         |             |      |                     |     |      |
| Less than \$25K          | 300         | 83.6 |                     |     |      |
| \$25K - \$50K            | 38          | 10.6 |                     |     |      |
| \$50K - \$75K            | 6           | 1.7  |                     |     |      |
| \$75K - \$100K           | 5           | 1.4  |                     |     |      |
| More than \$100K         | 10          | 2.8  |                     |     |      |
| CMS                      | 346         | 86.1 |                     |     |      |
| Previous Treatment       | 348         | 98.9 |                     |     |      |

*Note.* HS = high school; GED = general education development; CMS = Center for Medicare/Medicaid [participants]. Some totals either do not sum to 403 due to missing data or exceed 403 because participants could check multiple domains (e.g., presenting problem).

Table

**Survey participant reported current treatment modalities and referral sources (N = 403)**

| Treatment Modality               |     |      | Referral Source                   |     |      |
|----------------------------------|-----|------|-----------------------------------|-----|------|
|                                  | n   | %    |                                   | n   | %    |
| Individual Psychotherapy         | 360 | 89.3 | Primary Care Physician            | 89  | 22.1 |
| Group Psychotherapy              | 61  | 15.1 | Other Mental Health Care Provider | 144 | 35.8 |
| Medication                       | 298 | 73.9 | Insurance Company                 | 11  | 2.7  |
| Marital/Couples Therapy          | 15  | 3.7  | Friend or Family Member           | 62  | 15.4 |
| Family Therapy                   | 30  | 7.4  | Self                              | 151 | 37.6 |
| In Home Therapy                  | 21  | 5.2  | Other                             | 30  | 7.5  |
| School Based Services            | 29  | 7.2  |                                   |     |      |
| Community-Based Support Services | 61  | 15.1 |                                   |     |      |
| Other                            | 12  | 3.0  |                                   |     |      |

*Note.* Some totals either do not sum to 403 due to missing data or exceed 403 because participants could check multiple domains (e.g., presenting problem).

Table

**Semi-structured interview domains from patients in the sample**

---

Domain 1: Experience with mental health care

Domain 2: Experience searching for a mental health care provider

Domain 3: Experience evaluating mental health care outcomes

Domain 4: Perspectives on provider performance information

Domain 5: Mental health care preferences/considerations

Domain 6: Relative valuing of mental health care preferences/considerations

---

**Table: Domain 1: Experience with mental health care**

| Category                                       | Subcategory                              | No. of Core Ideas | No. of Cases | Typicality |
|------------------------------------------------|------------------------------------------|-------------------|--------------|------------|
| Providers worked with                          |                                          | 44                | 14           | G          |
| Outpatient services                            |                                          | 41                | 14           | G          |
|                                                | Individual counseling/psychotherapy      | 16                | 11           | T          |
|                                                | Medication management                    | 16                | 11           | T          |
|                                                | Group counseling/psychotherapy           | 3                 | 3            | V          |
|                                                | Other services                           | 2                 | 2            | V          |
|                                                | Psychoeducation/classes                  | 1                 | 1            | R          |
| Services receive(d)                            |                                          | 37                | 13           | G          |
|                                                | Hospitalization                          | 5                 | 4            | V          |
| Negative mental health care experiences        |                                          | 27                | 10           | T          |
|                                                | Gaps in care/turnover                    | 10                | 7            | V          |
|                                                | Insurance difficulties                   | 5                 | 4            | V          |
|                                                | Other negative experiences               | 4                 | 4            | V          |
|                                                | Characteristics or behavior of providers | 6                 | 3            | V          |
|                                                | Variable provider performance            | 2                 | 2            | V          |
| Focus on treatment                             |                                          | 9                 | 5            | V          |
|                                                | Skills worked on                         | 3                 | 3            | V          |
|                                                | Problems addressed                       | 4                 | 2            | V          |
| Switching providers/<br>numerous providers     |                                          | 7                 | 5            | V          |
| Frequency of receiving services                |                                          | 7                 | 5            | V          |
| Positive mental health care experiences        |                                          | 6                 | 3            | V          |
|                                                | Accessibility of services                | 3                 | 2            | V          |
|                                                | Warm/empathic                            | 1                 | 1            | V          |
| Duration of experience with mental health care |                                          | 3                 | 3            | V          |

*Note:* G = General, T = Typical, V = Variant, R = Rare. The total number of core ideas in each category will sometimes be greater than the total number in each category's respective subcategories, as some core ideas only fit into the broad category level and were not placed into a subcategory. Thus, the number of core ideas in a category reflects the total number of core ideas in its respective subcategories and the number of core ideas that only fit at the broader category level.

**Table: Domain 2: Experience searching for a mental health care provider**

| Category                                                | Subcategory                                       | No. of Core Ideas | No. of Cases | Typicality |
|---------------------------------------------------------|---------------------------------------------------|-------------------|--------------|------------|
| Perceived agency in the provider selection process      |                                                   | 24                | 14           | G          |
|                                                         | Adequate agency                                   | 12                | 8            | T          |
|                                                         | Lack of agency                                    | 12                | 8            | T          |
| Positive experience with the provider selection process |                                                   | 22                | 14           | G          |
|                                                         | Availability of provider information              | 4                 | 3            | V          |
| Provider selection process                              |                                                   | 78                | 13           | G          |
|                                                         | Professional referrals                            | 31                | 10           | T          |
|                                                         | Personal referrals                                | 13                | 9            | T          |
|                                                         | Looked for providers independently                | 11                | 6            | V          |
|                                                         | Expressing preferences                            | 7                 | 4            | V          |
|                                                         | Trial and error                                   | 7                 | 3            | V          |
|                                                         | Contacted clinics by phone                        | 4                 | 3            | V          |
|                                                         | Received list of providers from insurance company | 4                 | 3            | V          |
| Difficulty searching for providers                      |                                                   | 65                | 13           | G          |
|                                                         | Unavailability of provider information            | 15                | 12           | T          |
|                                                         | Logistics                                         | 10                | 6            | V          |
|                                                         | Insurance                                         | 18                | 5            | V          |
|                                                         | Negative emotional experiences                    | 8                 | 5            | V          |
|                                                         | Time consuming and complicated                    | 3                 | 3            | V          |
|                                                         | Waitlist                                          | 5                 | 2            | V          |
|                                                         | Clinicians' expertise                             | 3                 | 2            | V          |
|                                                         | Clinicians' personal characteristics              | 3                 | 2            | V          |
| Difficulty maintaining providers                        |                                                   | 13                | 7            | T          |
|                                                         | Clinician turnover                                | 8                 | 4            | V          |
|                                                         | Insurance                                         | 2                 | 2            | V          |
| Other                                                   |                                                   | 1                 | 1            | R          |

*Note:* G = General, T = Typical, V = Variant, R = Rare. The total number of core ideas in each category will sometimes be greater than the total number in each category's respective subcategories, as some core ideas only fit into the broad category level and were not placed into a subcategory. Thus, the number of core ideas in a category reflects the total number of core ideas in its respective subcategories and the number of core ideas that only fit at the broader category level.



**Table: Domain 3: Experience evaluating mental health care outcomes**

| Category                                                    | Subcategory                                | No. of Core Ideas | No. of Cases | Typicality |
|-------------------------------------------------------------|--------------------------------------------|-------------------|--------------|------------|
| Consumers have experience evaluating mental health outcomes |                                            | 29                | 12           | T          |
|                                                             | Satisfaction                               | 10                | 8            | T          |
|                                                             | Symptoms and functioning                   | 10                | 7            | V          |
|                                                             | Quality of life                            | 7                 | 6            | V          |
|                                                             | Unspecified outcomes                       | 2                 | 2            | V          |
| Perceived use of evaluations                                |                                            | 22                | 11           | T          |
|                                                             | Improve services                           | 12                | 9            | T          |
|                                                             | Unsure                                     | 5                 | 5            | V          |
|                                                             | Administrative purposes                    | 5                 | 3            | V          |
| Beliefs about how evaluations should be used                |                                            | 18                | 9            | T          |
|                                                             | Improve services                           | 5                 | 5            | V          |
|                                                             | Assess provider performance                | 5                 | 4            | V          |
|                                                             | Tracking patient progress                  | 2                 | 2            | V          |
|                                                             | Guide patient treatment                    | 2                 | 2            | V          |
|                                                             | Improve provider selection                 | 2                 | 2            | V          |
|                                                             | Research                                   | 2                 | 2            | V          |
|                                                             |                                            |                   |              |            |
| Never completed evaluations                                 |                                            | 10                | 8            | T          |
|                                                             | Satisfaction                               | 6                 | 6            | V          |
|                                                             | Unspecified outcomes                       | 4                 | 4            | V          |
| Other beliefs                                               |                                            | 13                | 7            | V          |
|                                                             | Evaluations are anonymous                  | 4                 | 3            | V          |
|                                                             | Evaluations are helpful                    | 4                 | 2            | V          |
|                                                             | Evaluations are required                   | 2                 | 2            | V          |
|                                                             | Evaluations are not used to full potential | 1                 | 1            | R          |
| Perceived evaluating agent                                  |                                            | 7                 | 3            | V          |
|                                                             | Clinic/hospital                            | 2                 | 2            | V          |
|                                                             | Insurance                                  | 2                 | 2            | V          |
|                                                             | State                                      | 3                 | 1            | R          |
| Discussed evaluations with providers                        |                                            | 3                 | 3            | V          |

*Note:* G = General, T = Typical, V = Variant, R = Rare. The total number of core ideas in each category will sometimes be greater than the total number in each category's respective subcategories, as some core ideas only fit into the broad category level and were not placed into a subcategory. Thus, the number of core ideas in a category reflects the total number of core ideas in its respective subcategories and the number of core ideas that only fit at the broader category level.

**Table: Domain 4: Perspectives on provider performance information**

| Category                                                    | Subcategory                               | No. of Core Ideas | No. of Cases | Typicality |
|-------------------------------------------------------------|-------------------------------------------|-------------------|--------------|------------|
| Payment                                                     |                                           | 15                | 14           | G          |
|                                                             | Willing to pay more if affordable         | 7                 | 6            | V          |
|                                                             | Unwilling to pay more                     | 5                 | 5            | V          |
|                                                             | Willing to pay more                       | 3                 | 3            | V          |
| Provider reimbursement                                      |                                           | 25                | 13           | G          |
|                                                             | Should not be reimbursed at higher rate   | 10                | 7            | V          |
|                                                             | Reimbursed at a higher rate               | 6                 | 6            | V          |
|                                                             | If no added cost to patient               | 4                 | 4            | V          |
|                                                             | Ambivalent                                | 3                 | 3            | V          |
|                                                             | For better performance                    | 2                 | 2            | V          |
| Positive views of PPI                                       |                                           | 54                | 12           | T          |
|                                                             | Comfortable using PPI                     | 13                | 12           | T          |
|                                                             | PPI used for finding best provider        | 17                | 9            | T          |
|                                                             | Access to PPI desired                     | 12                | 8            | T          |
|                                                             | PPI would be helpful                      | 8                 | 6            | V          |
|                                                             | PPI used to improve services              | 4                 | 4            | V          |
| Willing to wait to see a preferred or matched provider      |                                           | 15                | 12           | T          |
|                                                             | Yes                                       | 8                 | 8            | T          |
|                                                             | Depends on severity of patient's distress | 6                 | 5            | V          |
|                                                             | No                                        | 1                 | 1            | R          |
| Differential valuing of PPI vs. other factors               |                                           | 14                | 12           | T          |
|                                                             | PPI most important                        | 6                 | 6            | V          |
|                                                             | Other factors more important than PPI     | 3                 | 3            | V          |
|                                                             | Equally important                         | 2                 | 2            | V          |
| Preferred method of selecting preferred or matched provider |                                           | 13                | 12           | T          |
|                                                             | List of multiple providers                | 13                | 12           | T          |
| Potential pitfalls of using PPI                             |                                           | 31                | 11           | T          |
|                                                             | Subjectivity of patient reviews           | 13                | 6            | V          |
|                                                             | Extreme ratings                           | 6                 | 5            | V          |
|                                                             | Disadvantage for new providers            | 3                 | 2            | V          |
|                                                             | Legitimacy of patient reviews             | 2                 | 2            | V          |
|                                                             | Intrusive nature of data collection       | 1                 | 1            | R          |
| Preferred mode of access to PPI                             |                                           | 14                | 10           | T          |
|                                                             | Internet                                  | 9                 | 7            | V          |
|                                                             | Paper (flyer, pamphlet)                   | 5                 | 5            | V          |

|                                                                      |    |   |   |
|----------------------------------------------------------------------|----|---|---|
| Willingness to travel farther to see a preferred or matched provider | 4  | 4 | V |
| What PPI should include                                              | 15 | 3 | V |
| Patient reviews                                                      | 5  | 3 | V |
| Data (general)                                                       | 3  | 3 | V |
| Provider background information                                      | 3  | 2 | V |
| Success rates with specific disorders                                | 2  | 1 | R |
| Success rates with treatment modality                                | 1  | 1 | R |
| Success rates with specific demographic groups                       | 1  | 1 | R |
| Would not want access to PPI                                         | 2  | 2 | V |

---

*Note:* G = General, T = Typical, V = Variant, R = Rare. The total number of core ideas in each category will sometimes be greater than the total number in each category's respective subcategories, as some core ideas only fit into the broad category level and were not placed into a subcategory. Thus, the number of core ideas in a category reflects the total number of core ideas in its respective subcategories and the number of core ideas that only fit at the broader category level.

**Table: Domain 5: Mental health care preferences/considerations**

| Category                                   | Subcategory                                      | No. of Core Ideas | No. of Cases | Typicality |
|--------------------------------------------|--------------------------------------------------|-------------------|--------------|------------|
| Valued provider characteristics            |                                                  | 96                | 14           | G          |
|                                            | Interpersonal factors                            | 18                | 10           | T          |
|                                            | Expertise or specialization                      | 14                | 9            | T          |
|                                            | Training, education, credentials                 | 12                | 7            | V          |
|                                            | Experience (years worked)                        | 8                 | 7            | V          |
|                                            | Therapy style                                    | 11                | 5            | V          |
|                                            | Past patient outcomes/success rates              | 8                 | 5            | V          |
|                                            | Skill or competence                              | 7                 | 5            | V          |
|                                            | Gender                                           | 6                 | 4            | V          |
|                                            | Cultural sensitivity                             | 6                 | 3            | V          |
|                                            | Clean professional record                        | 2                 | 2            | V          |
|                                            | Match on patient characteristics                 | 1                 | 1            | R          |
|                                            | Preferred or matched provider                    | 1                 | 1            | R          |
|                                            | Other                                            | 1                 | 1            | R          |
| Ways to improve mental health care         |                                                  | 77                | 14           | G          |
|                                            | Greater access to provider information           | 27                | 10           | T          |
|                                            | Collecting outcome data                          | 6                 | 6            | V          |
|                                            | Streamlined logistical aspects/insurance changes | 6                 | 6            | V          |
|                                            | More information online                          | 7                 | 4            | V          |
|                                            | Greater patient say in treatment                 | 6                 | 4            | V          |
|                                            | Information from past patients/patient reviews   | 6                 | 4            | V          |
|                                            | Increased accessibility                          | 3                 | 3            | V          |
|                                            | More providers needed                            | 3                 | 3            | V          |
|                                            | Greater advertisement of resources               | 5                 | 2            | V          |
|                                            | Improve interpersonal fit                        | 3                 | 2            | V          |
|                                            | Better mental health awareness for patients      | 2                 | 2            | V          |
|                                            | Trial period                                     | 1                 | 1            | R          |
|                                            | Other important factors                          |                   | 22           | 8          |
| Avoiding turnover                          |                                                  | 10                | 4            | V          |
| Proximity and accessibility                |                                                  | 6                 | 4            | V          |
| Insurance                                  |                                                  | 3                 | 3            | V          |
| Availability of providers and appointments |                                                  | 1                 | 1            | R          |

*Note:* G = General, T = Typical, V = Variant, R = Rare. The total number of core ideas in each category will sometimes be greater than the total number in each category's respective subcategories, as some core ideas only fit into the broad category level and were not placed into a subcategory. Thus, the number of core ideas in a category reflects the total number of core ideas in its respective subcategories and the number of core ideas that only fit at the broader category level.

**Table: Domain 6: Relative valuing of mental health care preferences/considerations**

| Category                                                  | Subcategory (When Applicable) | No. of Core Ideas | No. of Cases | Typicality |
|-----------------------------------------------------------|-------------------------------|-------------------|--------------|------------|
| Most important factor                                     |                               | 21                | 12           | T          |
|                                                           | Interpersonal characteristics | 5                 | 5            | V          |
|                                                           | Skill or competence           | 5                 | 5            | V          |
|                                                           | Proximity/accessibility       | 4                 | 2            | V          |
|                                                           | Insurance                     | 3                 | 2            | V          |
|                                                           | Preferred or matched provider | 2                 | 2            | V          |
|                                                           | Demographics                  | 1                 | 1            | R          |
|                                                           | Experience (years worked)     | 1                 | 1            | R          |
| Considers a combination of factors                        |                               | 11                | 9            | T          |
| Experience less important than other factors              |                               | 2                 | 2            | V          |
| Willing to compromise on factor(s) for most valued factor |                               | 2                 | 2            | V          |
| Lists multiple factors as equally important               |                               | 1                 | 1            | R          |

*Note:* T = Typical, V = Variant, R = Rare.
